# Supplementary material
Source: HighWire-hosted journal article supplement (https://www.cmaj.ca/highwire/filestream/58242/field_highwire_adjunct_files/3/gender-kaul-online_appendix_4.pdf)
Supplement: gender-kaul-online_appendix_4.pdf [file gender-kaul-online_appendix_4.pdf]

**Appendix 4: Procedure rates, repeat events and resource use within 1 year following index emergency department visit among patients admitted to hospital\***

| Variable                                                        | Acute myocardial infarction |       |         | Unstable angina |       |         | Stable angina |       |         | Chest pain |       |         |
|-----------------------------------------------------------------|-----------------------------|-------|---------|-----------------|-------|---------|---------------|-------|---------|------------|-------|---------|
|                                                                 | Men                         | Women | p value | Men             | Women | p value | Men           | Women | p value | Men        | Women | p value |
| No. admitted to hospital†                                       | 4066                        | 1672  |         | 4002            | 2472  |         | 1477          | 1083  |         | 3796       | 2959  |         |
| Cardiac catheterization                                         | 57.4                        | 46.4  | < 0.01  | 54.5            | 43.6  | < 0.01  | 38.5          | 27.8  | < 0.01  | 23.7       | 15.0  | < 0.01  |
| Percutaneous coronary intervention                              | 39.1                        | 30.0  | < 0.01  | 23.2            | 13.3  | < 0.01  | 16.7          | 7.9   | < 0.01  | 9.8        | 4.9   | < 0.01  |
| Coronary artery bypass graft surgery                            | 11.9                        | 7.2   | < 0.01  | 14.5            | 7.3   | < 0.01  | 10.8          | 4.5   | < 0.01  | 4.4        | 1.5   | < 0.01  |
| Repeat myocardial infarction‡                                   | 28.5                        | 21.2  | < 0.01  | 8.5             | 4.7   | < 0.01  | 7.5           | 4.2   | < 0.01  | 7.1        | 2.8   | < 0.01  |
| No. of days to repeat myocardial infarction, median             | 29.0                        | 25.0  | 0.21    | 27.0            | 34.0  | 0.37    | 24.0          | 49.0  | 0.03    | 15.0       | 12.0  | 0.96    |
| Readmission rate at 1 yr                                        | 44.1                        | 46.4  | 0.12    | 43.8            | 38.5  | < 0.01  | 49.8          | 48.9  | 0.69    | 47.4       | 51.0  | < 0.01  |
| No. of readmissions per patient, mean§                          |                             |       |         |                 |       |         |               |       |         |            |       |         |
| All                                                             | 0.8                         | 0.9   | < 0.01  | 0.8             | 0.7   | < 0.01  | 1.0           | 1.0   | 0.67    | 1.0        | 1.1   | < 0.01  |
| Cardiac related                                                 | 0.7                         | 0.8   | < 0.01  | 0.7             | 0.6   | < 0.01  | 0.8           | 0.7   | 0.63    | 0.5        | 0.5   | 0.98    |
| No. of repeat visits to emergency department per patient,§ mean |                             |       |         |                 |       |         |               |       |         |            |       |         |
| All                                                             | 2.6                         | 2.8   | 0.01    | 2.7             | 2.6   | 0.42    | 3.4           | 3.5   | 0.51    | 4.0        | 4.8   | < 0.01  |
| Cardiac related                                                 | 1.8                         | 1.8   | 0.07    | 1.7             | 1.7   | 0.75    | 2.0           | 2.0   | 0.81    | 1.8        | 1.8   | 0.83    |

\*Values shown are percentages of patients unless stated otherwise.

†Patients admitted to an acute care facility within 48 hours after index emergency department visit.

‡Repeat visit to the emergency department with a primary diagnosis of myocardial infarction.

§Mean number of readmissions per patient among those who were readmitted.

§All patients had at least 1 repeat visit within the year after their index visit.
